# Supplementary material for: Preparation of CuNi/NH2-MIL-125(Ti) for the photocatalytic synthesis of 1,4-dihydropyridines and β-acetamido ketones
Source: Royal Society of Chemistry journal article supplement (doi:10.1039/d3cy01244a), 2023-01-01
Supplement: d3cy01244a1.pdf [file d3cy01244a1.pdf]

## Preparation of CuNi/NH<sub>2</sub>-MIL-125(Ti) for the photocatalytic synthesis of 1,4-dihydropyridines and β-acetamido ketones

Shayan Movahedi, Mohammad Jafarzadeh\*

Department of Organic Chemistry, Razi University, Kermanshah 67149-67346, Iran

\*Correspondence: E-mail: m.jafar@razi.ac.ir, mjafarzadeh5@gmail.com; Tel.: +98-83-34279296

**Table S1.** Comparison studies in the efficiency of CuNi/NH<sub>2</sub>-MIL-125 with reported catalytic systems for the synthesis of 1,4-DHP using benzaldehyde, ethyl acetoacetate, and NH<sub>4</sub>OAc.

| Entry | Catalyst                                                                           | Conditions                                                                | Time (h) | Isolated yield (%) [ref] |
|-------|------------------------------------------------------------------------------------|---------------------------------------------------------------------------|----------|--------------------------|
| 1     | H <sub>3</sub> PW <sub>12</sub> O <sub>40</sub> @PCN-222 (0.01 g)                  | Neat, 60 °C                                                               | 5        | 90 [1]                   |
| 2     | MIL-101-SO <sub>3</sub> H (20 wt.%)                                                | EtOH, 60 °C                                                               | 8        | 99 [2]                   |
| 3     | BNPs@SiO <sub>2</sub> (CH <sub>2</sub> ) <sub>3</sub> NHSO <sub>3</sub> H (0.06 g) | EtOH, 70 °C                                                               | 0.5      | 97 [3]                   |
| 4     | -                                                                                  | Ethyl-L-lactate (50 mol%)/H <sub>2</sub> O, visible light (W lamp, 150 W) | 2.5      | 90 [4]                   |
| 5     | CuNi/NH <sub>2</sub> -MIL-125 (0.02 g)                                             | EtOH, visible light (LED, 100 W)                                          | 0.5      | 96 [this work]           |

**Table S2.** Comparison studies in the efficiency of CuNi/NH<sub>2</sub>-MIL-125 with reported catalytic systems for the synthesis of β-acetamido ketone using benzaldehyde, acetophenone, acetyl chloride, and acetonitrile.

| Entry | Catalyst                                                                 | Conditions                 | Time (h) | Isolated yield (%) [ref] |
|-------|--------------------------------------------------------------------------|----------------------------|----------|--------------------------|
| 1     | ZrOCl <sub>2</sub> ·8H <sub>2</sub> O (15 mol%)                          | r.t.                       | 12       | 83 [5]                   |
| 2     | Sc(OTf) <sub>3</sub> (10 mol%)                                           | r.t.                       | 30       | 82 [6]                   |
| 3     | PhB(OH) <sub>2</sub> (10 mol%)                                           | r.t.                       | 3        | 75 <sup>a</sup> [7]      |
| 4     | Montmorillonite K-10 (2 g)                                               | 70 °C                      | 1        | 80 [8]                   |
| 5     | H <sub>7</sub> SiV <sub>3</sub> W <sub>9</sub> O <sub>40</sub> (10 mol%) | 80 °C                      | 0.6      | 90 [9]                   |
| 6     | CuNi/NH <sub>2</sub> -MIL-125 (0.02 g)                                   | visible light (LED, 100 W) | 2.5      | 92 [this work]           |

<sup>a</sup> using 4-methylacetophenone.

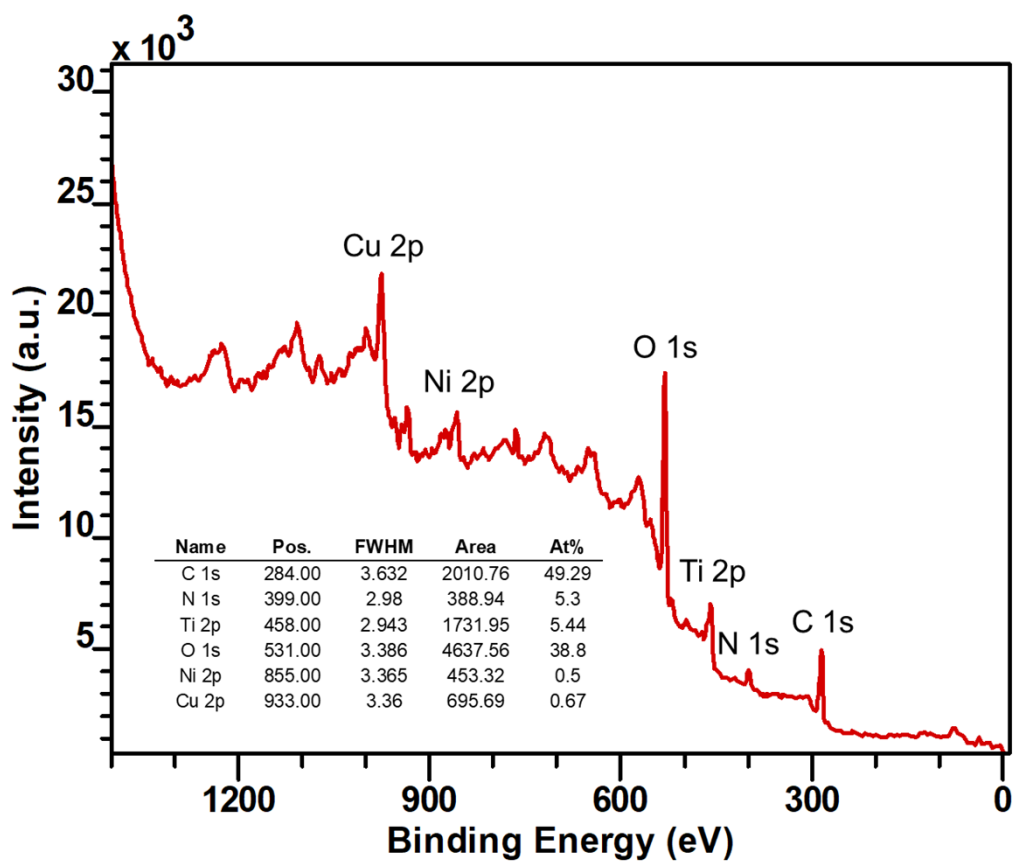

Figure S1. XPS survey of CuNi/NH<sub>2</sub>-MIL-125.

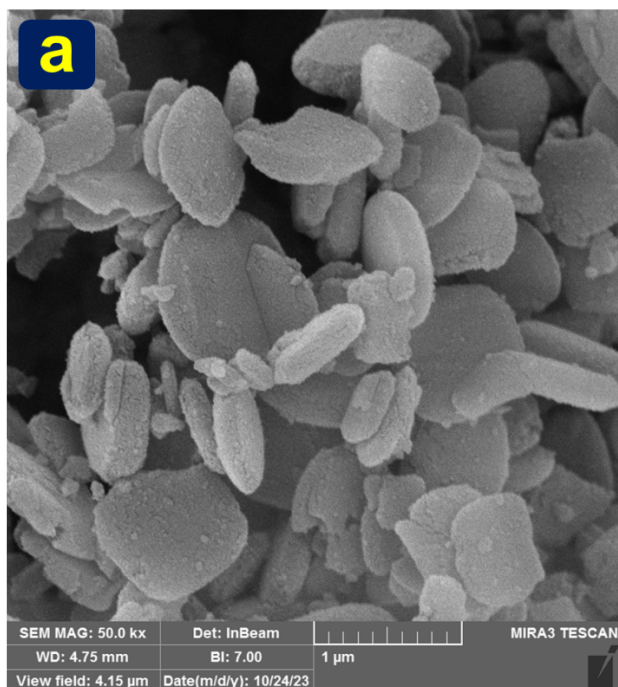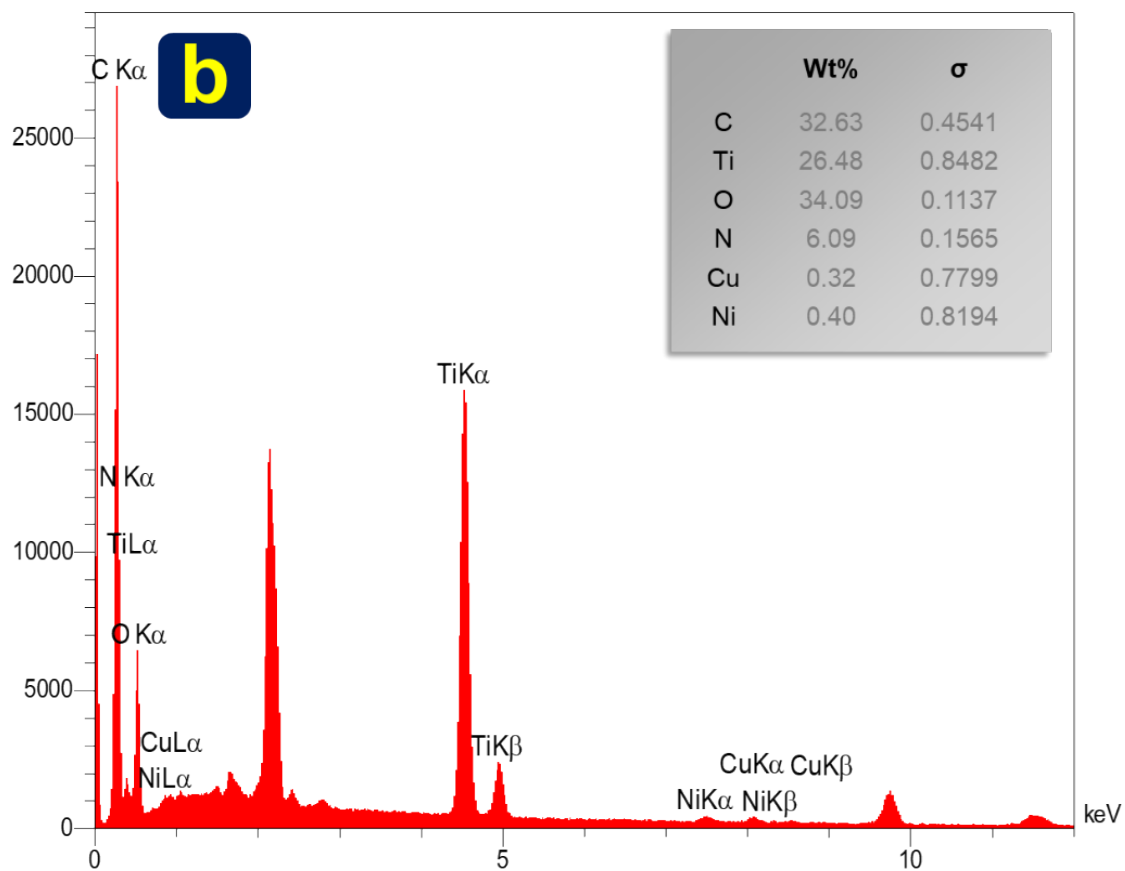

**Figure S2.** SEM image and EDX spectrum of CuNi/NH<sub>2</sub>-MIL-125 after four-time reusing.

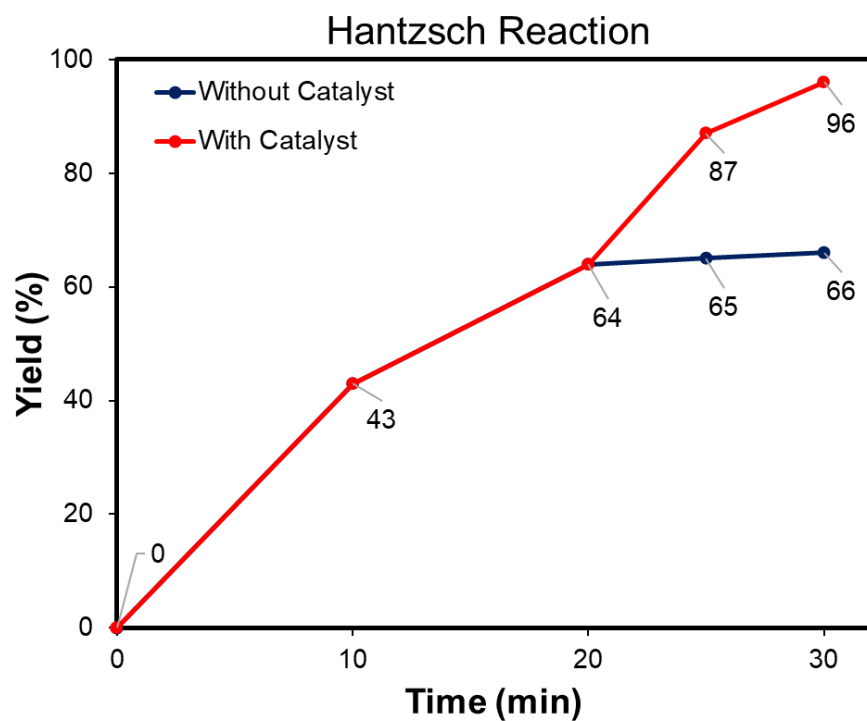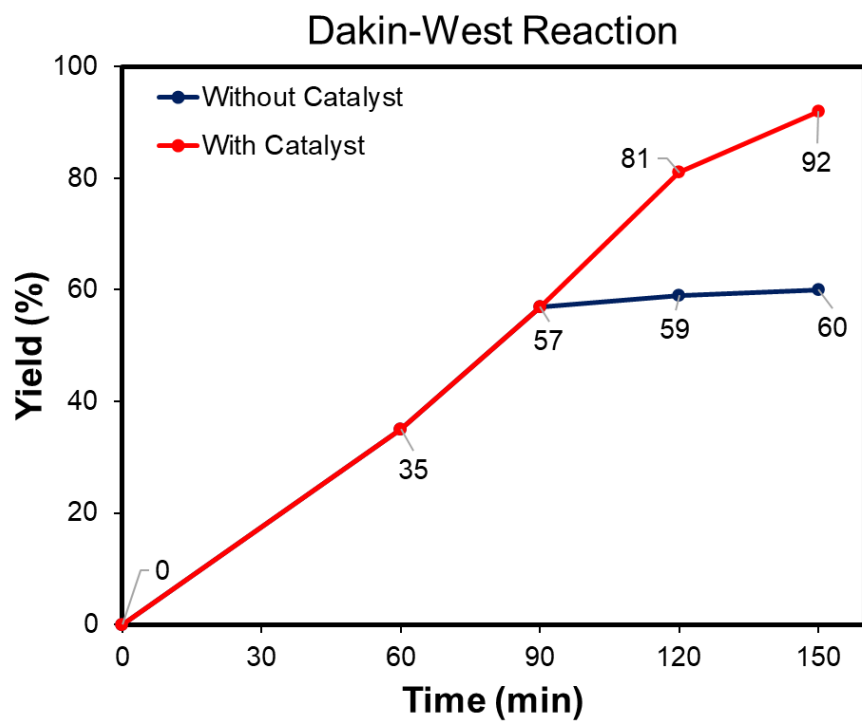

**Figure S3.** Hot filtration test of the photocatalyst for the Hantzsch and Dakin-West reactions.

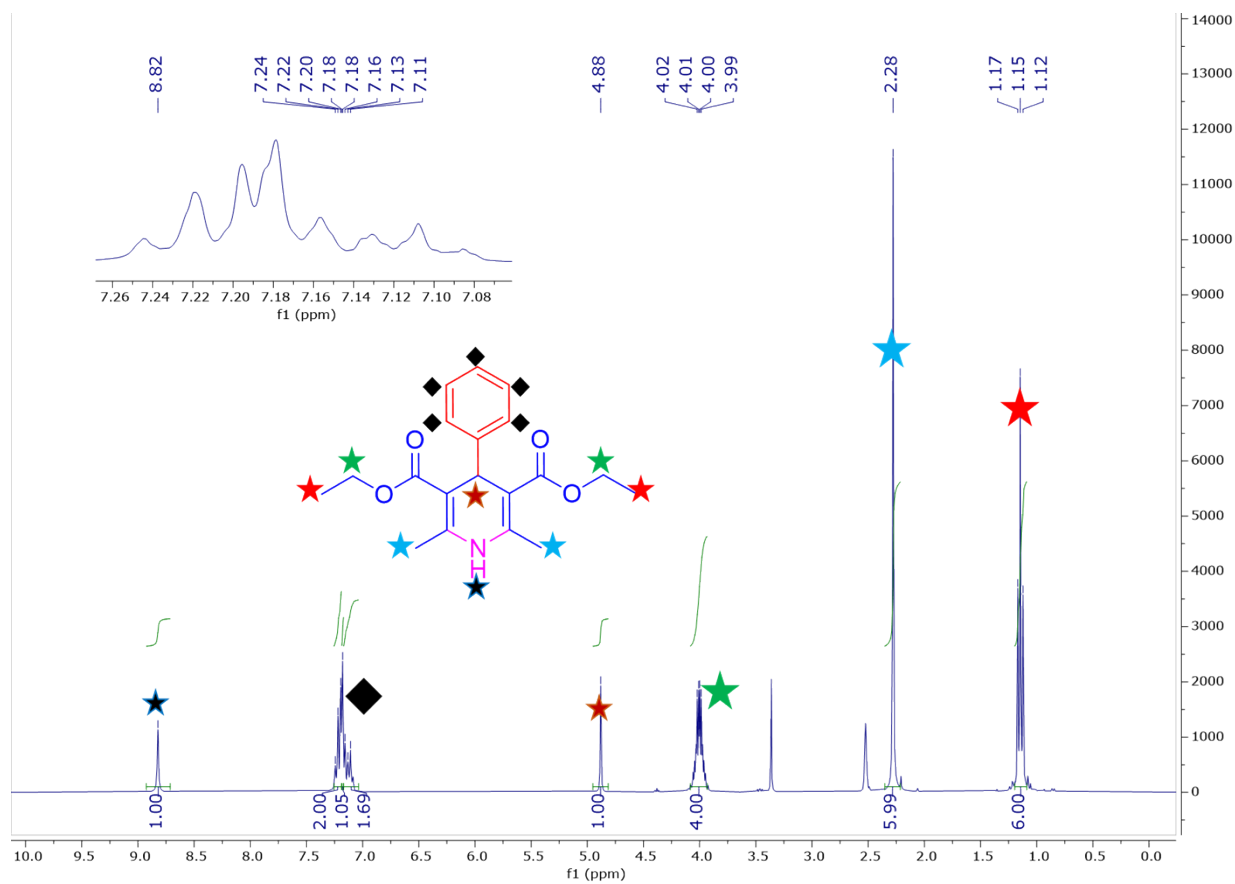

<sup>1</sup>H NMR (300 MHz, DMSO-*d*<sub>6</sub>),  $\delta$ : 8.82 (s, 1H), 7.23 (t,  $J = 7.3$  Hz, 2H), 7.21–7.15 (m, 1H), 7.16 (d,  $J = 6.9$  Hz, 2H), 4.88 (s, 1H), 4.00 (q,  $J = 4.1$  Hz, 4H), 2.28 (s, 6H), 1.15 (t,  $J = 7.1$  Hz, 6H).

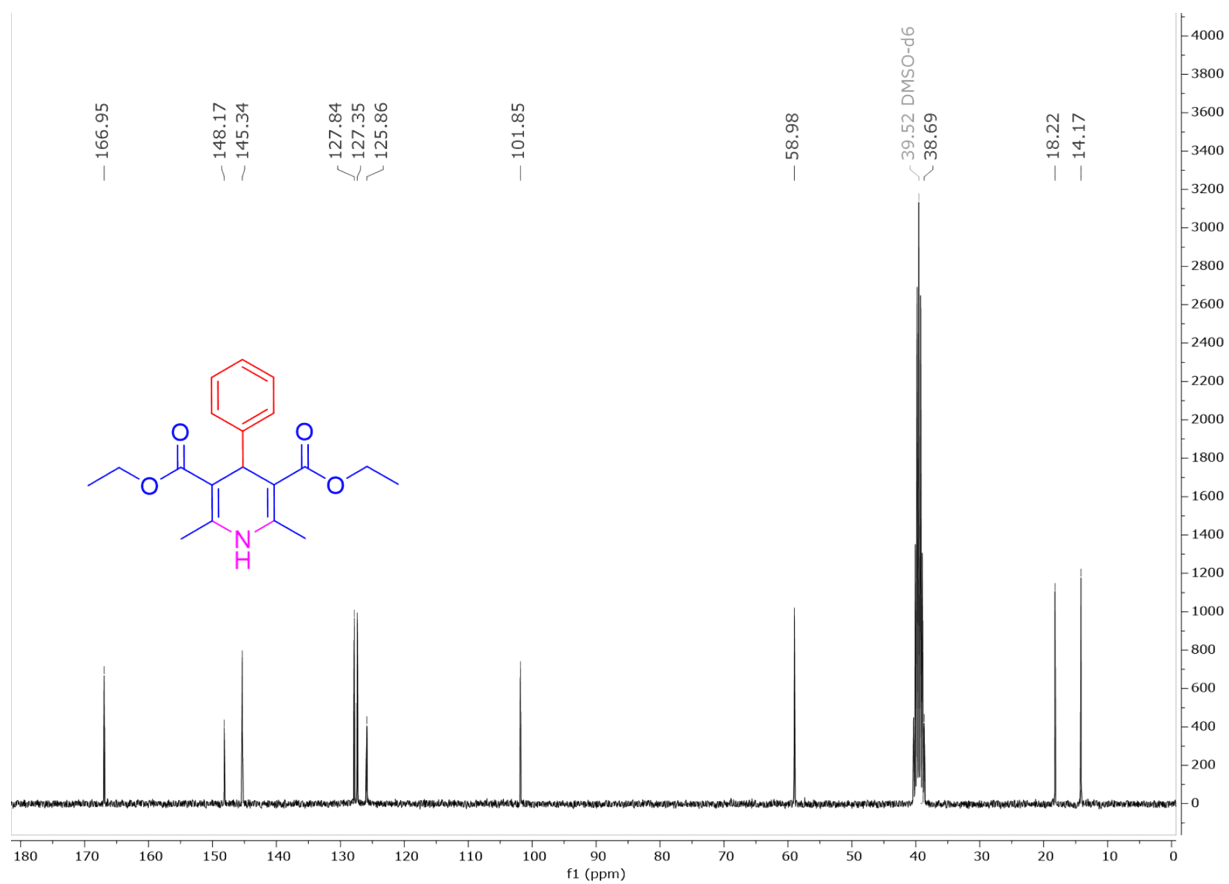

$^{13}\text{C}$  NMR (75 MHz,  $\text{DMSO-}d_6$ ),  $\delta$ : 166.95, 148.17, 145.34, 127.84, 127.35, 125.86, 101.85, 58.98, 38.69, 18.22, 14.17.

**Figure S4.**  $^1\text{H}$  and  $^{13}\text{C}$  NMR of diethyl 2,6-dimethyl-4-phenyl-1,4-dihydropyridine-3,5-dicarboxylate (Table 3, entry 1).

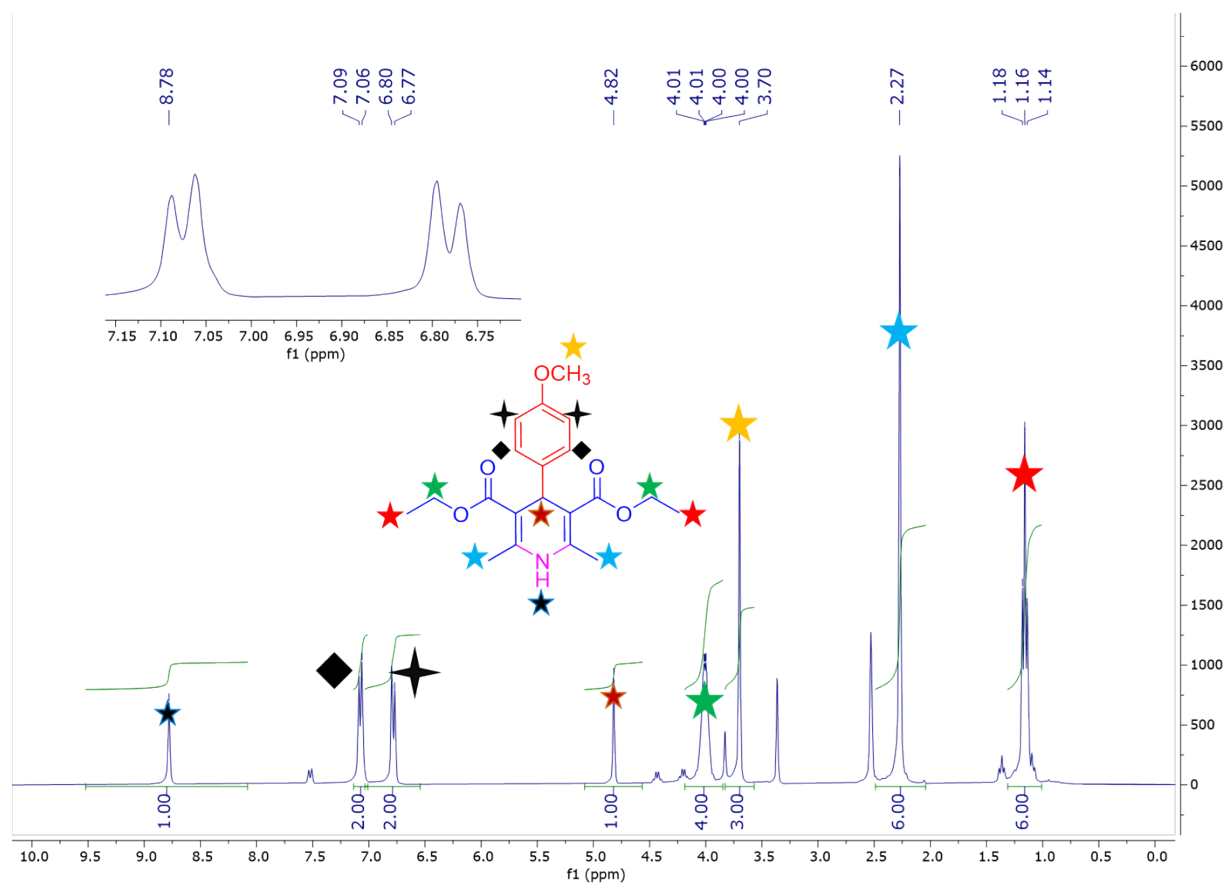

$^1\text{H}$  NMR (300 MHz,  $\text{DMSO-}d_6$ ),  $\delta$ : 8.78 (s, 1H), 7.09–7.06 (d,  $J = 7.3$  Hz, 2H), 6.80–6.76 (d,  $J = 8.4$  Hz, 2H), 4.82 (s, 1H), 4.01 (q,  $J = 3.6, 1.3$  Hz, 4H), 3.70 (s, 3H), 2.27 (s, 6H), 1.16 (t,  $J = 6.5$  Hz, 6H).

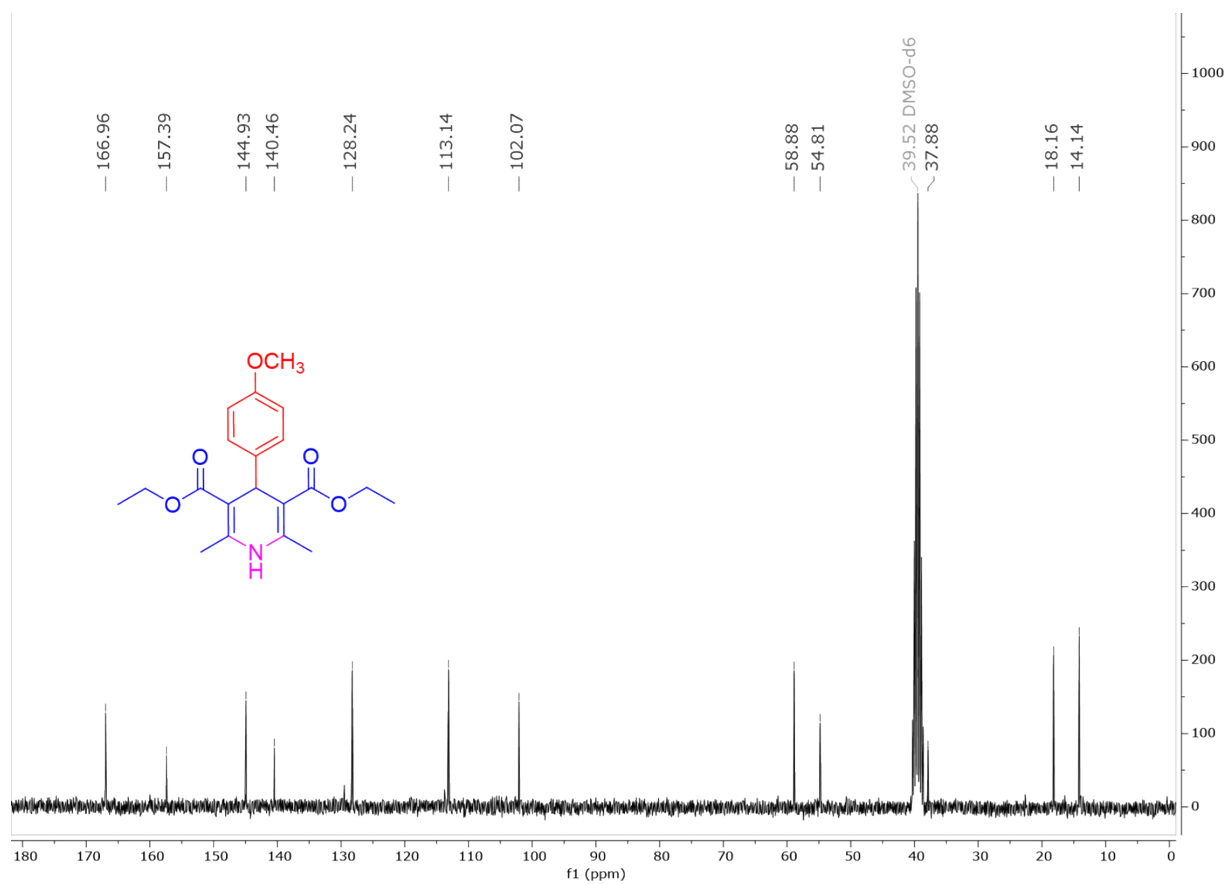

<sup>13</sup>C NMR (75 MHz, DMSO-*d*<sub>6</sub>),  $\delta$ : 166.96, 157.39, 144.93, 140.46, 128.24, 113.14, 102.07, 58.88, 54.81, 37.88, 18.16, 14.14.

**Figure S5.** <sup>1</sup>H and <sup>13</sup>C NMR of diethyl 4-(4-methoxyphenyl)-2,6-dimethyl-1,4-dihydropyridine-3,5-dicarboxylate (Table 3, entry 3).



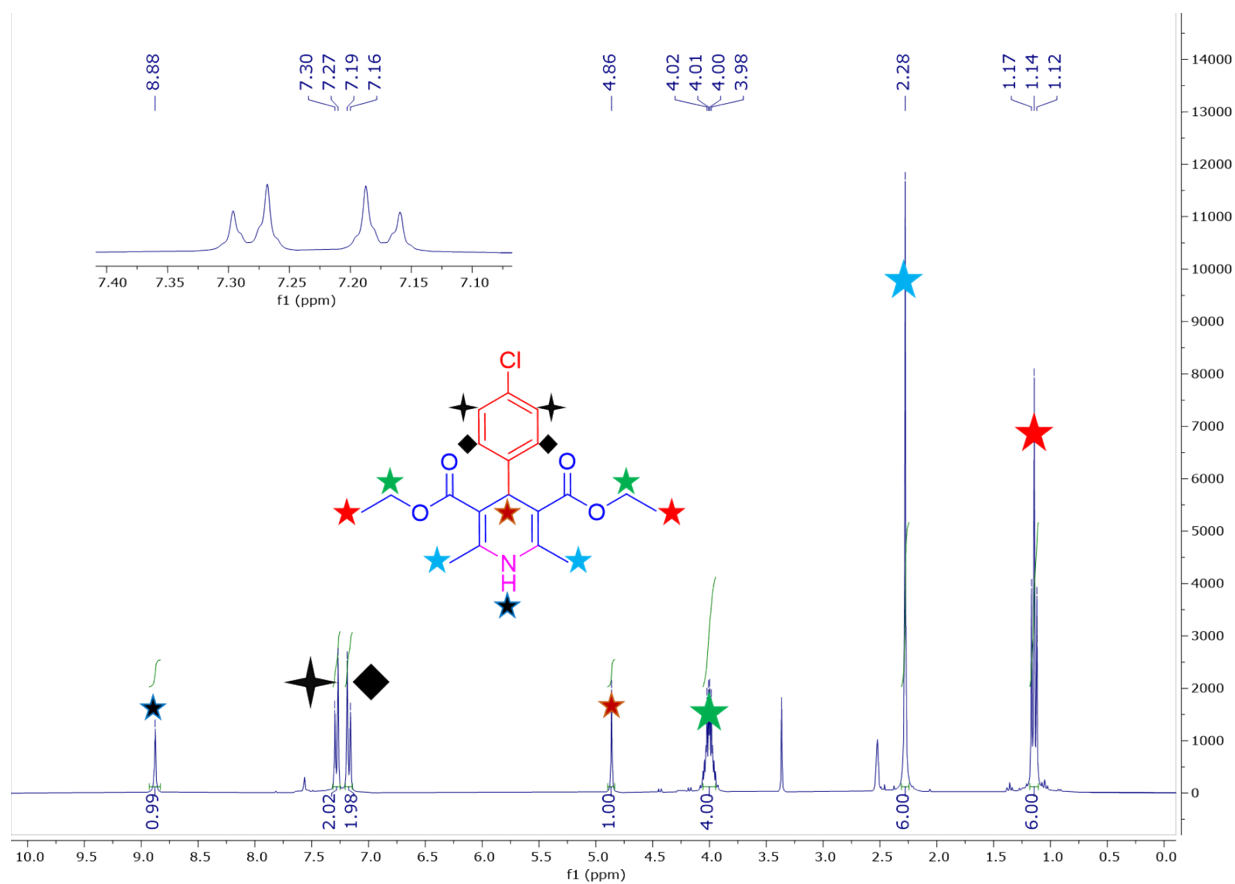

$^1\text{H}$  NMR (300 MHz,  $\text{DMSO-}d_6$ ),  $\delta$ : 8.88 (s, 1H), 7.30–7.27 (d,  $J = 8.4$  Hz, 2H), 7.19–7.16 (d,  $J = 8.5$  Hz, 2H), 4.86 (s, 1H), 4.02–3.98 (q,  $J = 4.3$  Hz, 4H), 2.28 (s, 6H), 1.14 (t,  $J = 7.1$  Hz, 6H).

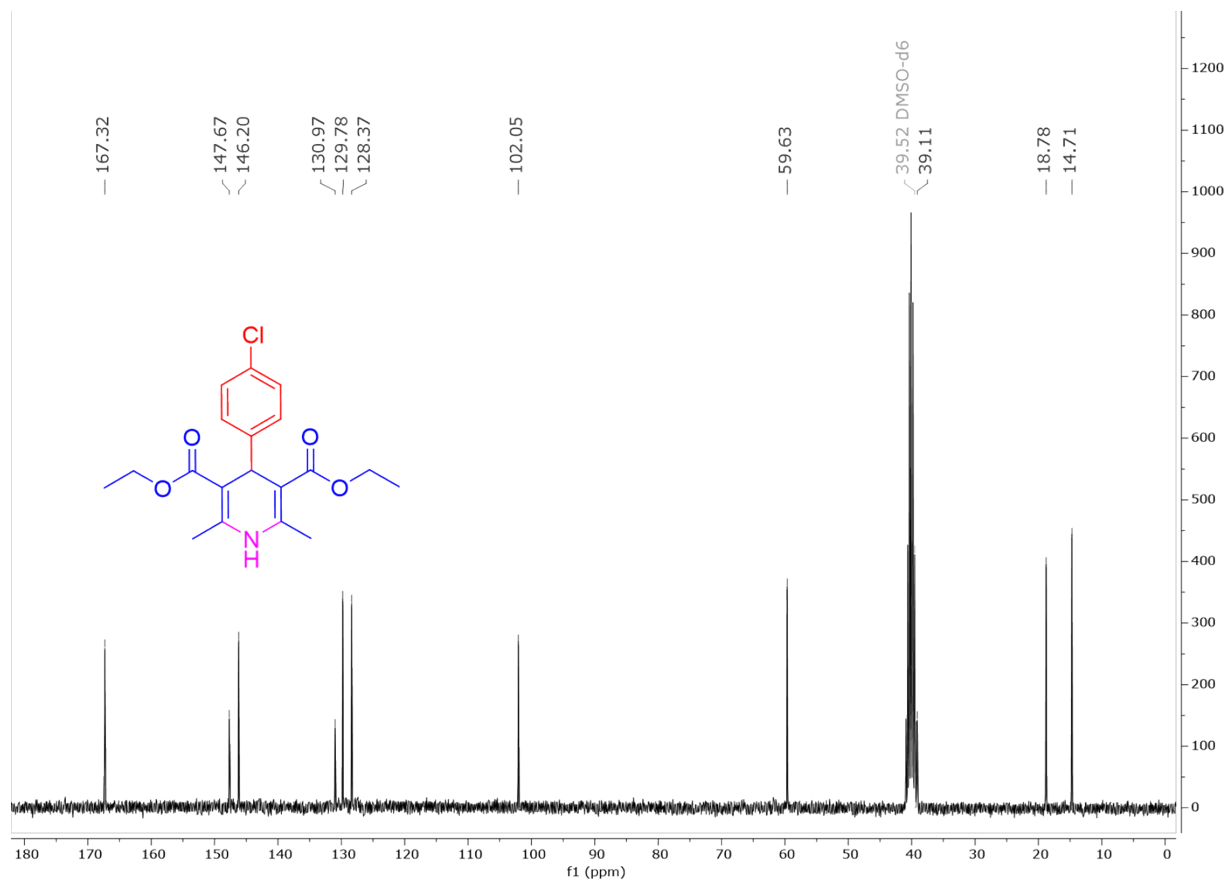

$^{13}\text{C}$  NMR (75 MHz,  $\text{DMSO-}d_6$ ),  $\delta$ : 167.32, 147.67, 146.20, 130.97, 129.78, 128.37, 102.05, 59.63, 39.11, 18.78, 14.71.

**Figure S6.**  $^1\text{H}$  and  $^{13}\text{C}$  NMR of diethyl 4-(4-chlorophenyl)-2,6-dimethyl-1,4-dihydropyridine-3,5-dicarboxylate (Table 3, entry 5).

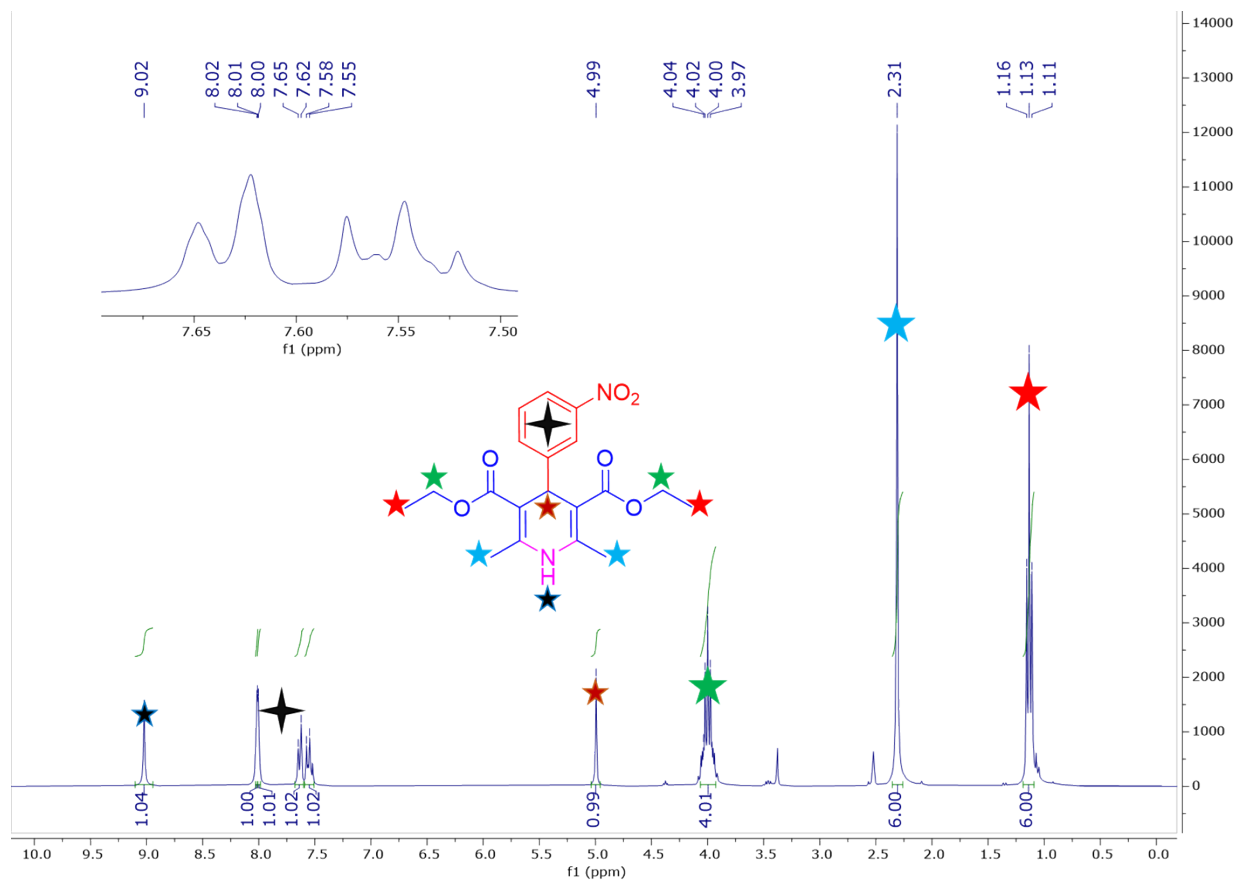

<sup>1</sup>H NMR (300 MHz, DMSO-*d*<sub>6</sub>),  $\delta$ : 9.02 (s, 1H), 8.02–8.00 (d, 1H), 8.00 (s, 1H), 7.65–7.62 (d,  $J = 7.9$  Hz, 1H), 7.58–7.55 (d,  $J = 8.5$  Hz, 1H), 4.99 (s, 1H), 4.04–3.97 (q,  $J = 7.2$  Hz, 4H), 2.31 (s, 6H), 1.13 (t,  $J = 7.1$  Hz, 6H).

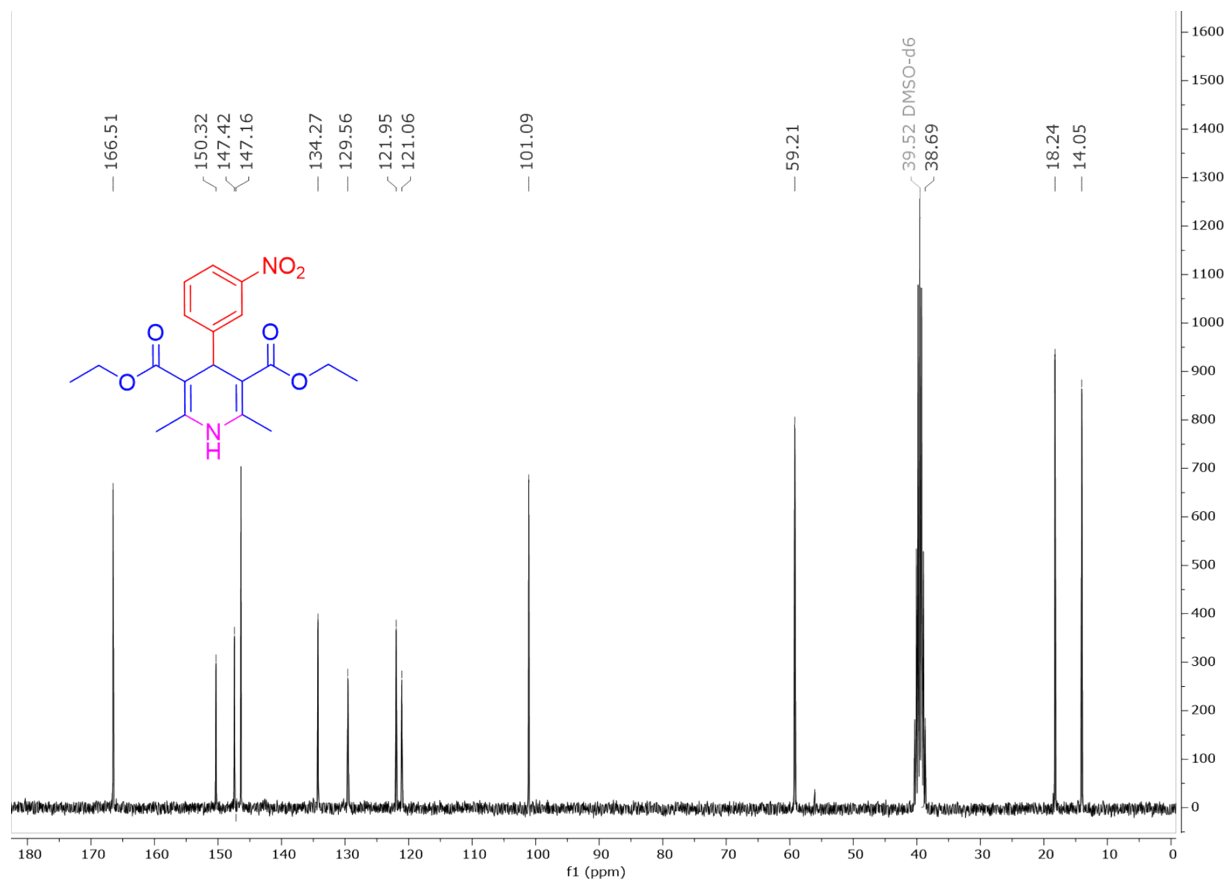

$^{13}\text{C}$  NMR (75 MHz,  $\text{DMSO}-d_6$ ),  $\delta$ : 166.51, 150.32, 147.42, 147.16, 134.27, 129.56, 121.95, 121.06, 101.09, 59.21, 38.69, 18.24, 14.05.

**Figure S7.**  $^1\text{H}$  and  $^{13}\text{C}$  NMR of diethyl 2,6-dimethyl-4-(3-nitrophenyl)-1,4-dihydropyridine-3,5-dicarboxylate (Table 3, entry 6).

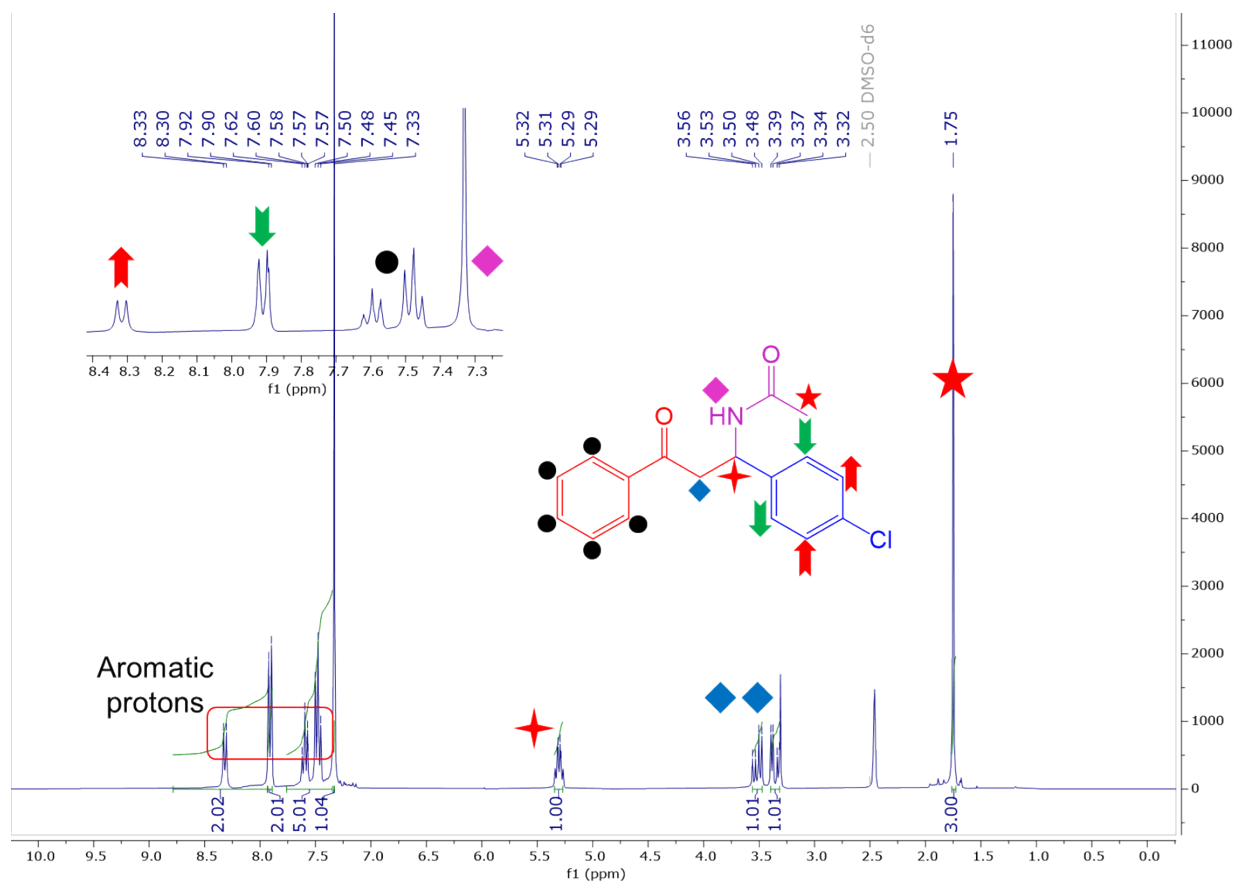

$^1\text{H}$  NMR (300 MHz,  $\text{DMSO-}d_6$ ),  $\delta$ : 8.34–8.30 (d,  $J = 7.8$  Hz, 2H), 7.94–7.88 (d,  $J = 7.0$  Hz, 2H), 7.63–7.44 (m, 5H), 7.33 (s, 1H), 5.34–5.28 (dd,  $J = 7.4, 7.4$  Hz, 1H), 3.57–3.46 (dd,  $J = 17.2, 8.3$  Hz, 1H), 3.41–3.31 (dd,  $J = 17.3, 5.9$  Hz, 1H), 1.75 (s, 3H).

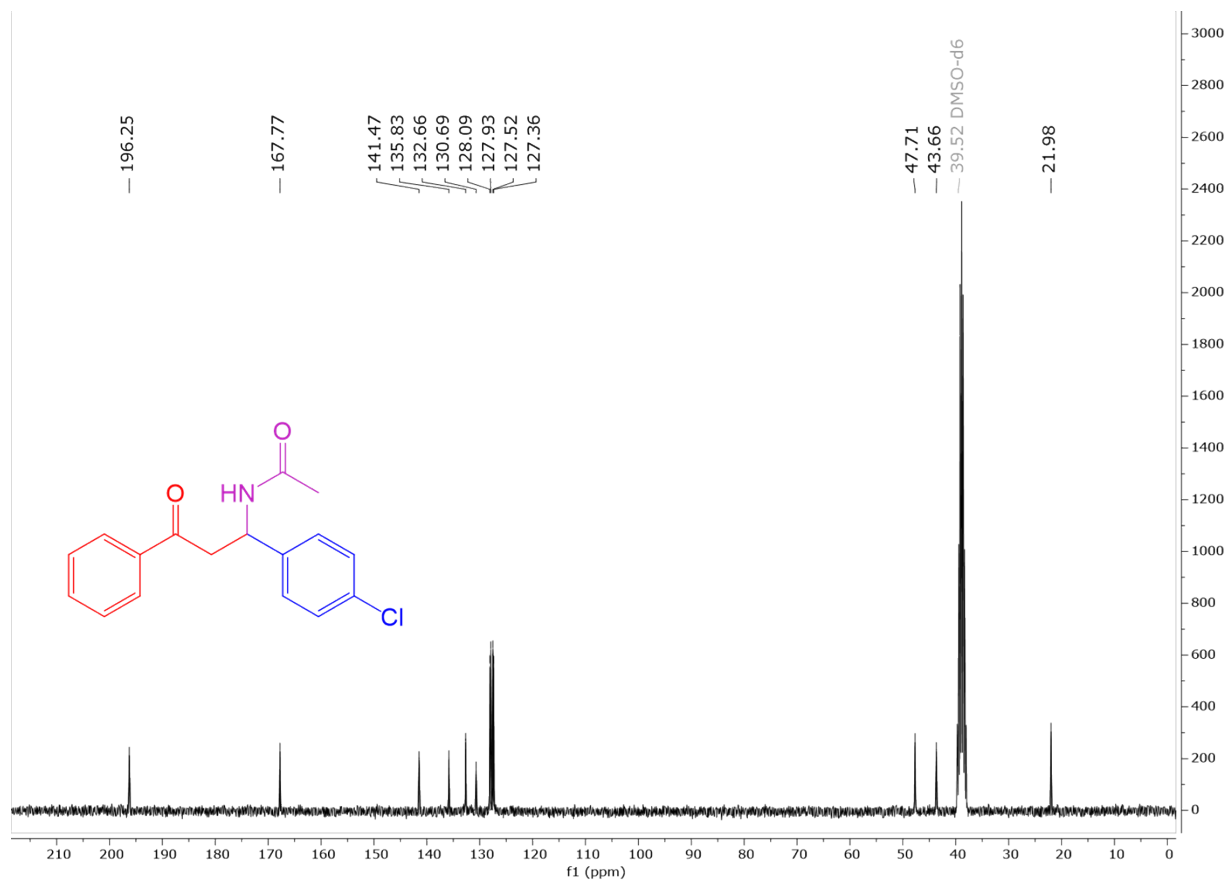

<sup>13</sup>C NMR (75 MHz, DMSO-*d*<sub>6</sub>),  $\delta$ : 196.25, 167.77, 141.47, 135.83, 132.66, 130.69, 128.09, 127.93, 127.52, 127.36, 47.71, 43.66, 21.98.

**Figure S8.** <sup>1</sup>H and <sup>13</sup>C NMR of *N*-(1-(4-chlorophenyl)-3-oxo-3-phenylpropyl)acetamide (Table 5, entry 3).

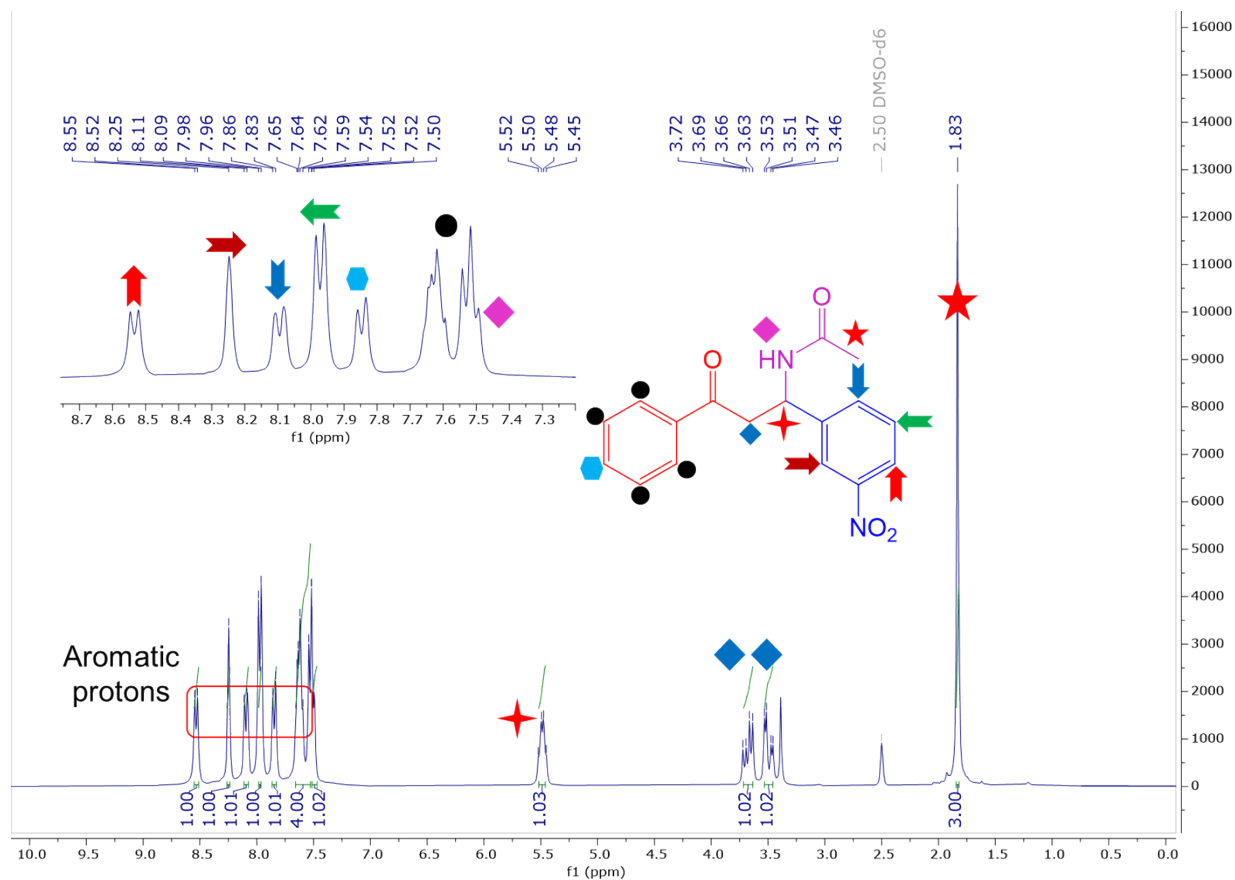

$^1\text{H}$  NMR (300 MHz,  $\text{DMSO-}d_6$ ),  $\delta$ : 8.55–8.52 (d,  $J = 7.5$  Hz, 1H), 8.25 (s, 1H), 8.11–8.09 (d,  $J = 7.7$  Hz, 1H), 7.98–7.96 (d,  $J = 7.1$  Hz, 1H), 7.85 (d,  $J = 7.7$  Hz, 1H), 7.69–7.51 (m, 4H), 7.50 (s, 1H), 5.55–5.43 (dd,  $J = 7.6, 7.6$  Hz, 1H), 3.72–3.63 (dd,  $J = 17.6, 8.4$  Hz, 1H), 3.55–3.45 (dd,  $J = 17.5, 5.4$  Hz, 1H), 1.83 (s, 3H).

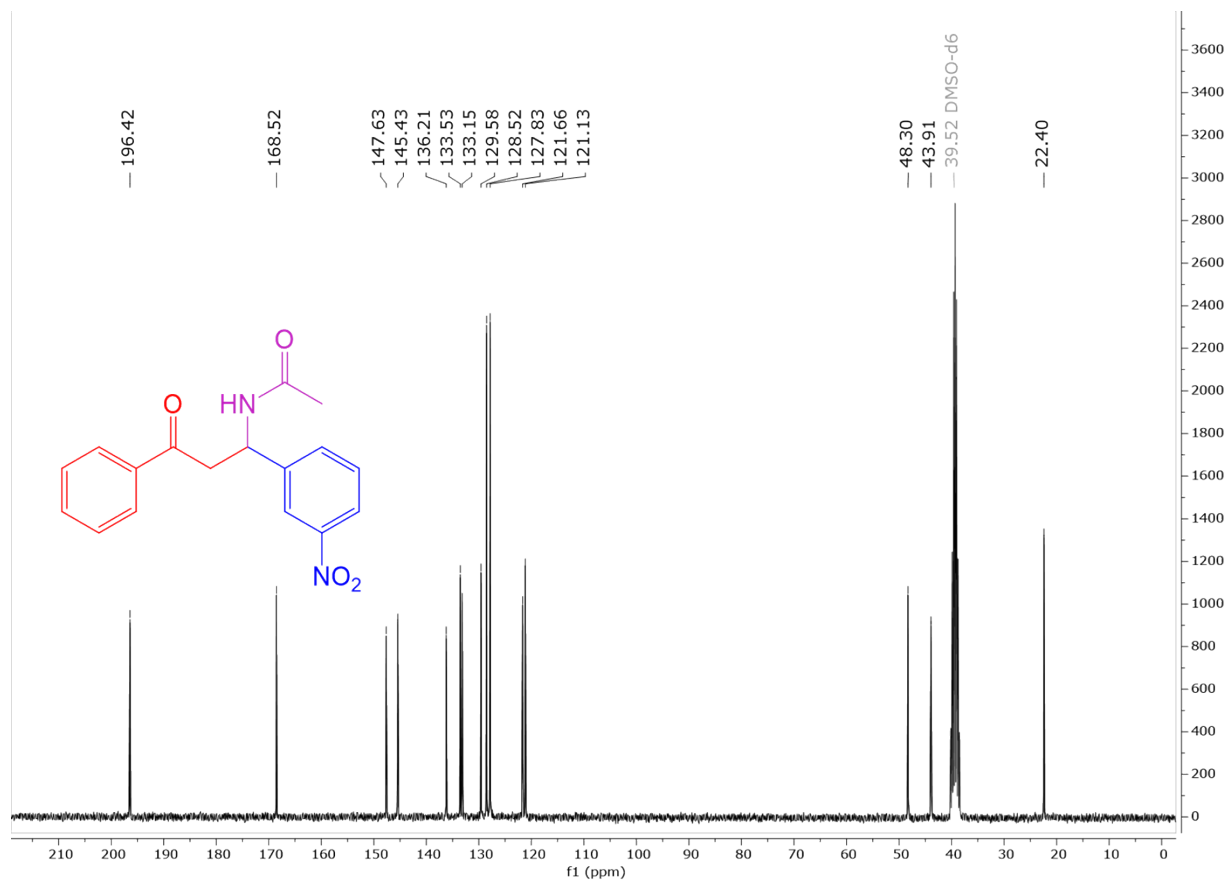

<sup>13</sup>C NMR (75 MHz, DMSO-*d*<sub>6</sub>),  $\delta$ : 196.42, 168.52, 147.63, 145.43, 136.21, 133.53, 133.15, 129.58, 128.52, 127.83, 121.66, 121.13, 48.30, 43.91, 22.40.

**Figure S9.** <sup>1</sup>H and <sup>13</sup>C NMR of *N*-(1-(3-nitrophenyl)-3-oxo-3-phenylpropyl)acetamide (Table 5, entry 6).



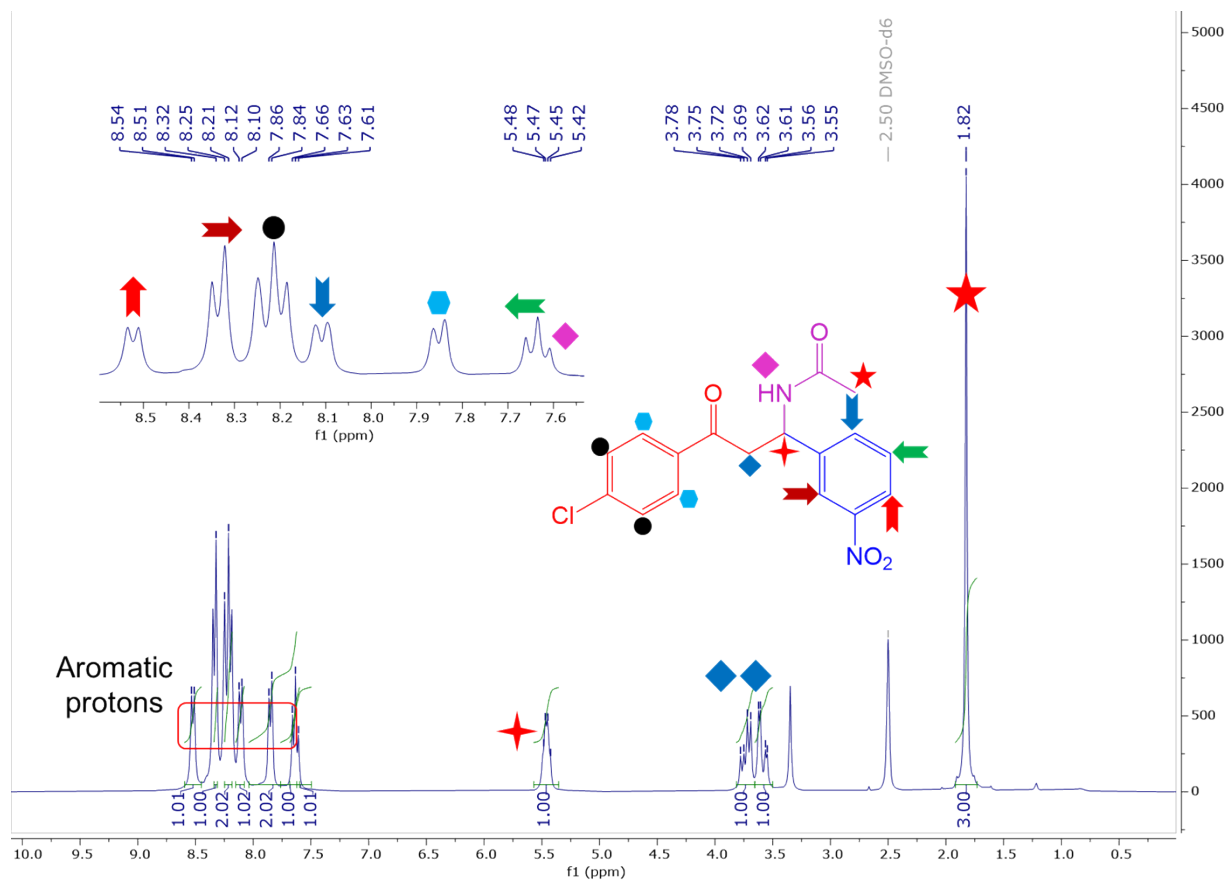

$^1\text{H}$  NMR (300 MHz,  $\text{DMSO-}d_6$ ),  $\delta$ : 8.54–8.51 (d,  $J = 7.4$  Hz, 1H), 8.32 (s, 1H), 8.26–8.20 (d,  $J = 10.7$  Hz, 2H), 8.14–8.08 (d,  $J = 7.4$  Hz, 1H), 7.88–7.82 (d,  $J = 7.6$  Hz, 2H), 7.68–7.62 (d,  $J = 8.0$  Hz, 1H), 7.61 (s, 1H), 5.50–5.42 (dd,  $J = 7.7, 7.7$  Hz, 1H), 3.80–3.68 (dd,  $J = 17.9, 8.8$  Hz, 1H), 3.64–3.54 (dd,  $J = 17.9, 5.1$  Hz, 1H), 1.82 (s, 3H).

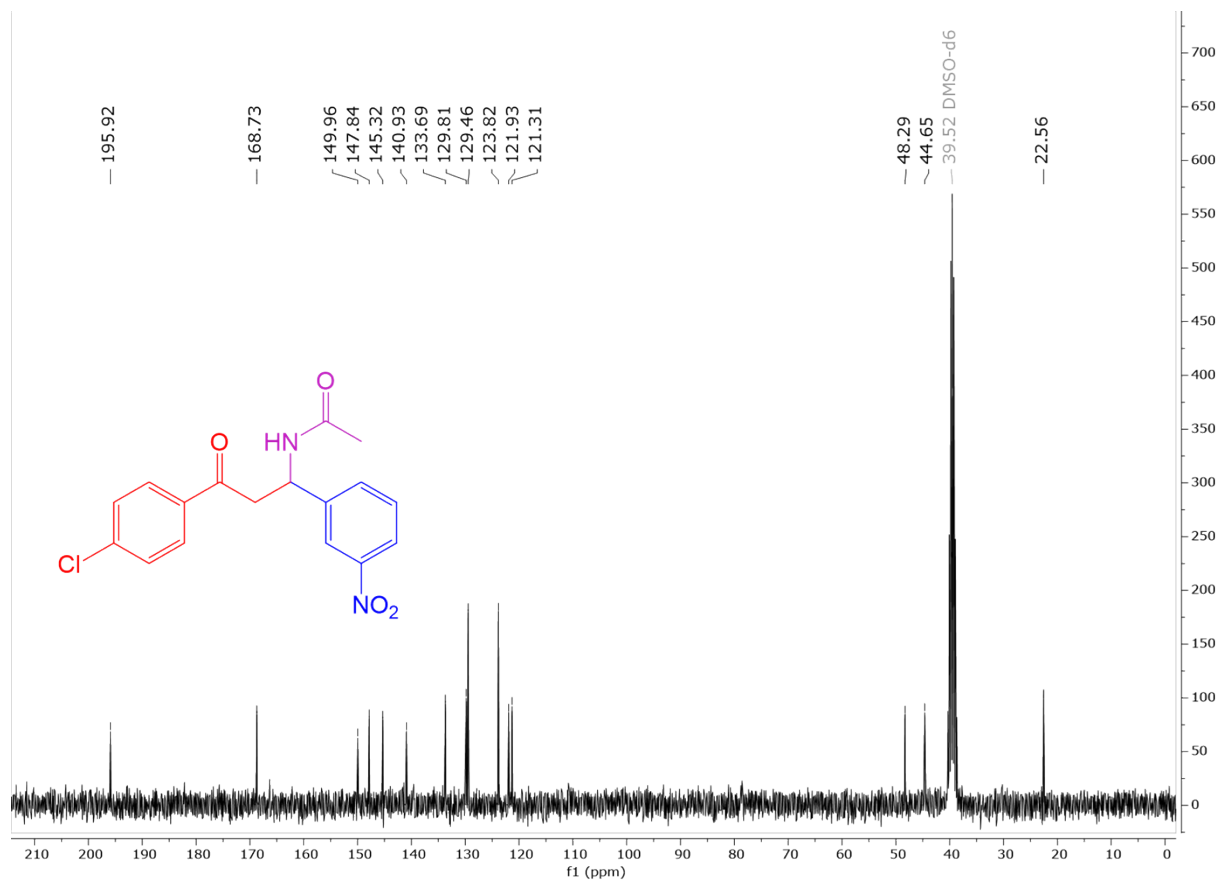

<sup>13</sup>C NMR (75 MHz, DMSO-*d*<sub>6</sub>), δ: 195.92, 168.73, 149.96, 147.84, 145.32, 140.93, 133.69, 129.81, 129.46, 123.82, 121.93, 121.31, 48.29, 44.65, 22.56.

**Figure S10.** <sup>1</sup>H and <sup>13</sup>C NMR of *N*-(3-(4-chlorophenyl)-1-(3-nitrophenyl)-3-oxopropyl)acetamide (Table 5, entry 7).

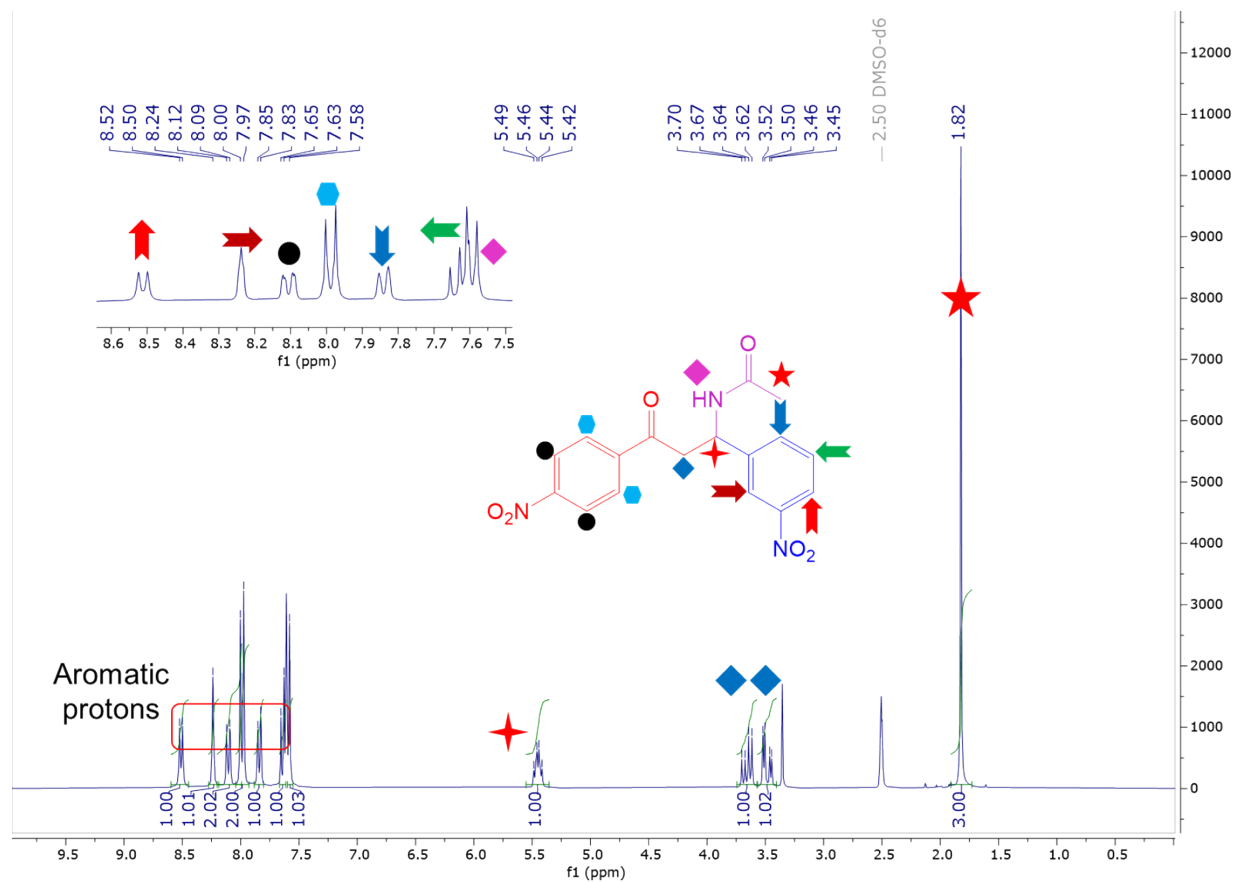

$^1\text{H}$  NMR (300 MHz,  $\text{DMSO}-d_6$ ),  $\delta$ : 8.52–8.50 (d,  $J = 7.5$  Hz, 1H), 8.24 (s, 1H), 8.13–8.09 (d,  $J = 8.2$  Hz, 2H), 8.00–7.97 (d,  $J = 8.6$  Hz, 2H), 7.86–7.82 (d,  $J = 7.5$  Hz, 1H), 7.66–7.62 (d,  $J = 8.0$  Hz, 1H), 7.58 (s, 1H), 5.48–5.42 (dd,  $J = 7.8, 7.8$  Hz, 1H), 3.72–3.60 (dd,  $J = 17.6, 8.6$  Hz, 1H), 3.54–3.44 (dd,  $J = 17.6, 5.3$  Hz, 1H), 1.82 (s, 3H).

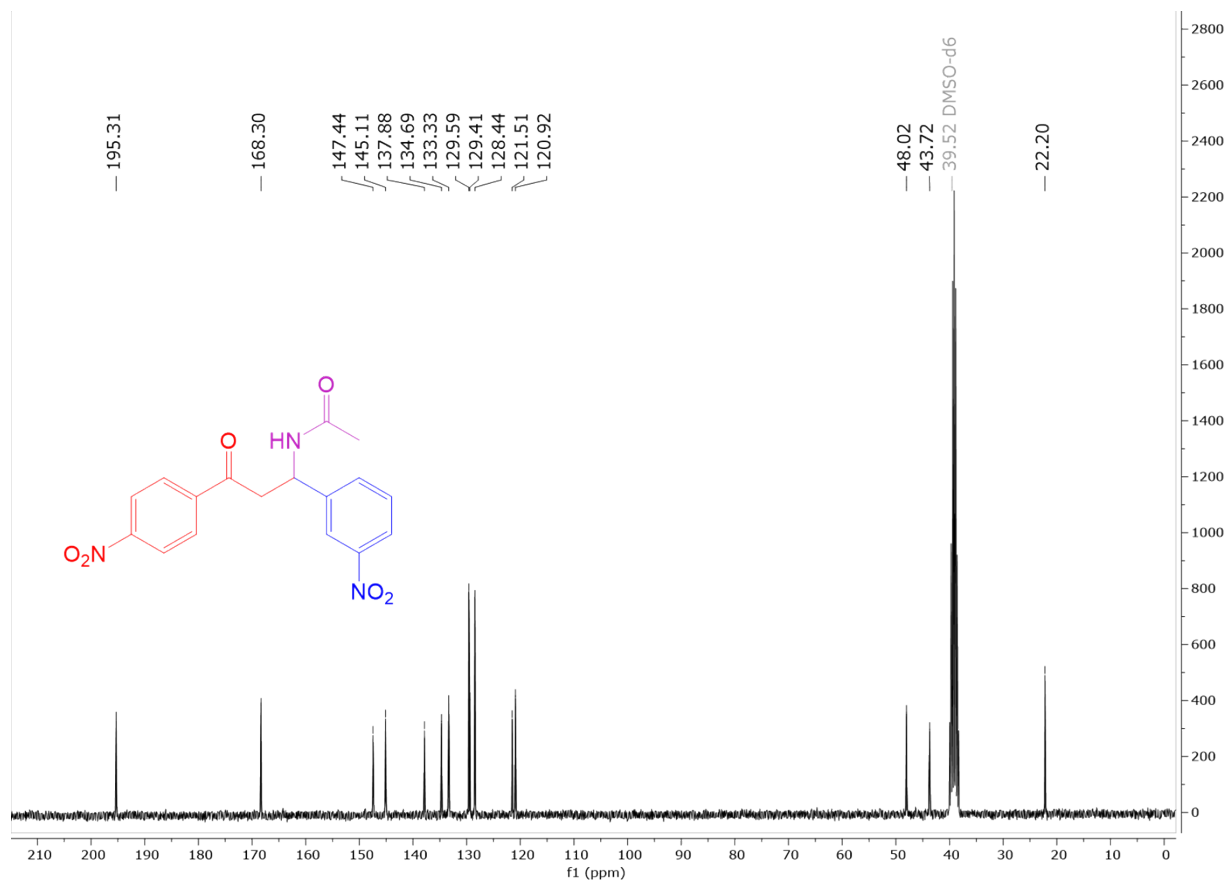

<sup>13</sup>C NMR (75 MHz, DMSO-*d*<sub>6</sub>),  $\delta$ : 195.31, 168.30, 147.44, 145.11, 137.88, 134.69, 133.33, 129.59, 129.41, 128.44, 121.51, 120.92, 48.02, 43.72, 22.20.

**Figure S11.** <sup>1</sup>H and <sup>13</sup>C NMR of *N*-(1-(3-nitrophenyl)-3-(4-nitrophenyl)-3-oxopropyl)acetamide (Table 5, entry 8).

## References

1. S. Karamzadeh, E. Sanchooli, A. R. Oveisi, S. Daliran, and R. Luque, *Appl. Catal. B: Environ.*, 2022, **303**, 120815.
2. N. Devarajan, and P. Suresh, *New J. Chem.*, 2019, **43**, 6806–6814.
3. M. Khodamorady, S. Sohrabnezhad, and K. Bahrami, *Polyhedron*, 2020, **178**, 114340.
4. P. P. Ghosh, S. Paul, and A. R. Das, *Tetrahedron Lett.*, 2013, **54**, 138–142.
5. R. Ghosh, S. Maiti, A. Chakraborty, S. Chakraborty, and A. K. Mukherjee, *Tetrahedron*, 2006, **62**, 4059–4064.

6. G. Pandey, R. P. Singh, A. Garg, and V. K. Singh, *Tetrahedron Lett.*, 2005, **46**, 2137–2140.
7. A. Z. Chibane, R. Boulcina, H. Boulebd, C. Bensouici, M. Yildirim, and A. Debache, *Tetrahedron*, 2020, **76**, 131260.
8. D. Bahulayan, S. K. Das, and J. Iqbal, *J. Org. Chem.*, 2003, **68**, 5735–5738.
9. R. Tayebee, and A. Pejhan, *Appl. Organomet. Chem.*, 2020, **34**, e5350.
